# Supplementary material
Source: ML conference proceedings conference paper supplement (https://proceedings.mlr.press/v70/beygelzimer17a.html)
Supplement: Supplementary file 1 [file beygelzimer17a-supp.pdf]

## A. Adaptive Tuning of the Exploration Rate

In Theorem 2 we have presented a tuning of  $\gamma$  that guarantees a regret of the order of  $\tilde{O}(\frac{1}{\eta}\sqrt{T})$ . However, this setting requires to upper bound the sum of the quadratic terms with a worst case bound. In this section, we develop an adaptive strategy for the tuning of the exploration rate  $\gamma$  that guarantees an optimal bound w.r.t. to the tightest sum of the quadratic terms.

First, we make rate dependent of the time, i.e.  $\gamma_t$ . Our aim is to choose  $\gamma_t$  in each time step in order to minimize the excess mistake bound  $\mathbb{E} \left[ \sum_{t=1}^T \gamma_t + \frac{1}{\eta(2-\eta)} \sum_{t=1}^T \frac{k}{\gamma_t} \mathbf{z}_t^T \mathbf{A}_t^{-1} \mathbf{z}_t \right]$ . The main result is that, adaptively setting  $\gamma_t$ 's would result in a bound within (roughly) a constant factor of that obtained by the best fixed  $\gamma$  in hindsight. We start with a technical lemma.

**Lemma 4.** *Let  $c_1, \dots, c_T \in [0, b]$  be a sequence of real numbers,  $a > 0$ , and define  $\gamma_t = \min \left( \sqrt{\frac{b + \sum_{s=1}^{t-1} c_s}{t}}, 1 \right)$ . We have,*

$$\sum_{t=1}^T \left( \gamma_t + a \frac{c_t}{\gamma_t} \right) \leq (2 + 2a)\sqrt{T} \sqrt{b + \sum_{t=1}^T c_t} + a \sum_{t=1}^T c_t.$$

*Proof.* First, note that

$$\sum_{t=1}^T \gamma_t \leq \sum_{t=1}^T \sqrt{\frac{b + \sum_{s=1}^{t-1} c_s}{t}} \leq \sqrt{b + \sum_{s=1}^T c_s} \sum_{t=1}^T \sqrt{\frac{1}{t}} \leq 2\sqrt{T} \sqrt{b + \sum_{s=1}^T c_s}.$$

Second, using the elementary chain of inequalities  $\max(a, b) \leq a + b, \forall a, b \geq 0$ , we have that

$$\begin{aligned} \sum_{t=1}^T \frac{c_t}{\gamma_t} &= \sum_{t=1}^T \max \left( \frac{c_t \sqrt{t}}{\sqrt{b + \sum_{s=1}^{t-1} c_s}}, c_t \right) \\ &\leq \sum_{t=1}^T \sqrt{T} \frac{c_t}{\sqrt{b + \sum_{s=1}^{t-1} c_s}} + \sum_{t=1}^T c_t \\ &\leq \sqrt{T} \sum_{t=1}^T \frac{c_t}{\sqrt{\sum_{s=1}^t c_s}} + \sum_{t=1}^T c_t \\ &\leq 2\sqrt{T} \sqrt{b + \sum_{s=1}^T c_s} + \sum_{t=1}^T c_t, \end{aligned}$$

where the last inequality uses Lemma 3.5 of (Auer et al., 2002). Combining the two inequalities, we get the desired result.  $\square$

Built upon the lemma above, we show that, tailored to our setting, the adaptive tuning would result in a bound within a constant factor of that achieved by the best fixed  $\gamma$  in hindsight.

**Theorem 5.** *Running SOBA with the adaptive setting of  $\gamma_t = \min \left( \sqrt{\frac{k(1 + \sum_{s=1}^{t-1} \mathbf{z}_s^T \mathbf{A}_s^{-1} \mathbf{z}_s)}{t}}, 1 \right)$  and  $a = X^2$ , we have that*

$$\mathbb{E}[M] \leq L_\eta(\mathbf{U}) + O \left( X^2 \|\mathbf{U}\|_F^2 + \frac{1}{\eta} (\sqrt{dk^2 T \ln T} + dk^2 \ln T) \right).$$

*Proof Sketch.* Following the same proof as Theorem 3, we get that

$$\mathbb{E}[\hat{M}_T] \leq L_\eta(\mathbf{U}) + \frac{a\eta \|\mathbf{U}\|_F^2}{2-\eta} + \frac{1}{\eta(2-\eta)} \mathbb{E} \left[ \sum_{t=1}^T \frac{k}{\gamma_t} \mathbf{z}_t^T \mathbf{A}_t^{-1} \mathbf{z}_t \right]$$

Meanwhile by triangle inequality,

$$\mathbb{E}[M_T] \leq \mathbb{E}[\hat{M}_T] + \mathbb{E}\left[\sum_{t=1}^T \mathbf{1}[\tilde{y}_t \neq \hat{y}_t]\right] \leq \mathbb{E}[\hat{M}_T] + \mathbb{E}\left[\sum_{t=1}^T \gamma_t\right].$$

Combining the two inequalities above, we get

$$\mathbb{E}[M_T] \leq L_\eta(\mathbf{U}) + \frac{a\eta\|\mathbf{U}\|_F^2}{2-\eta} + \mathbb{E}\left[\frac{1}{\eta(2-\eta)} \sum_{t=1}^T \frac{k \mathbf{z}_t^T \mathbf{A}_t^{-1} \mathbf{z}_t}{\gamma_t} + \sum_{t=1}^T \gamma_t\right].$$

We take a closer look at the last term. Lemma 4 with  $c_t = k \mathbf{z}_t^T \mathbf{A}_t^{-1} \mathbf{z}_t \in [0, k]$ ,  $b = k$ ,  $a = \frac{1}{\eta(2-\eta)}$ , implies that

$$\begin{aligned} & \sum_{t=1}^T \gamma_t + \sum_{t=1}^T \frac{k}{\eta(2-\eta)\gamma_t} \mathbf{z}_t^T \mathbf{A}_t^{-1} \mathbf{z}_t \\ & \leq \left(2 + \frac{2}{\eta(2-\eta)}\right) \sqrt{T} \sqrt{k\left(1 + \sum_{t=1}^T \mathbf{z}_t^T \mathbf{A}_t^{-1} \mathbf{z}_t\right) + \frac{1}{\eta(2-\eta)} k\left(1 + \sum_{t=1}^T \mathbf{z}_t^T \mathbf{A}_t^{-1} \mathbf{z}_t\right)}. \end{aligned}$$

Taking the expectation of both sides and using Lemma 3, we get that the last term on the right hand side is at most  $\frac{12}{\eta}(\sqrt{dk^2 T \ln T} + dk^2 \ln T)$ . This completes the proof.  $\square$

## B. Deferred Proofs

*Proof of Theorem 1.* Let  $p \geq 2$  such that  $\frac{1}{p} + \frac{1}{q} = 1$ . Denote by  $b_t$  the indicator variable that multiclass Perceptron makes an update, i.e. makes a mistake. We have:

$$\begin{aligned} & \langle \mathbf{W}_{T+1}, \mathbf{U} \rangle \\ & \leq \|\mathbf{W}_{T+1}\|_F \|\mathbf{U}\|_F \\ & = \|\mathbf{U}\|_F \sqrt{\|\mathbf{W}_T\|^2 + 2b_t \langle \mathbf{W}_T, (\mathbf{e}_{y_T} - \mathbf{e}_{\hat{y}_T}) \otimes \mathbf{x}_T \rangle + 2b_t^2 \|\mathbf{x}_T\|_2^2} \\ & \leq \|\mathbf{U}\|_F \sqrt{\|\mathbf{W}_T\|_F^2 + 2b_t^2 \|\mathbf{x}_T\|_2^2} \\ & \leq \dots \\ & \leq \|\mathbf{U}\|_F \sqrt{2 \sum_{t=1}^T b_t^2 \|\mathbf{x}_t\|_2^2} \\ & \leq \|\mathbf{U}\|_F X \sqrt{2} \sqrt{\sum_{t=1}^T b_t^2} \\ & = \|\mathbf{U}\|_F X \sqrt{2} \sqrt{\sum_{t=1}^T b_t} \end{aligned}$$

Also, we have, that

$$\begin{aligned}
 \langle \mathbf{W}_{T+1}, \mathbf{U} \rangle &= \sum_{t=1}^T b_t \langle \mathbf{U}, (\mathbf{e}_{y_t} - \mathbf{e}_{\hat{y}_t}) \otimes \mathbf{x}_t \rangle \\
 &= \sum_{t=1}^T b_t [1 - (1 - \langle \mathbf{U}, (\mathbf{e}_{y_t} - \mathbf{e}_{\hat{y}_t}) \otimes \mathbf{x}_t \rangle)] \\
 &\geq \sum_{t=1}^T b_t [1 - |1 - \langle \mathbf{U}, (\mathbf{e}_{y_t} - \mathbf{e}_{\hat{y}_t}) \otimes \mathbf{x}_t \rangle|] \\
 &\geq \sum_{t=1}^T b_t - \sum_{t=1}^T b_t \ell(\mathbf{U}, (\mathbf{x}_t, y_t)) \\
 &\geq \sum_{t=1}^T b_t - \left( \sum_{t=1}^T b_t^p \right)^{\frac{1}{p}} \left( \sum_{t=1}^T \ell(\mathbf{U}, (\mathbf{x}_t, y_t))^q \right)^{\frac{1}{q}} \\
 &= \sum_{t=1}^T b_t - \left( \sum_{t=1}^T b_t \right)^{\frac{1}{p}} \left( \sum_{t=1}^T \ell(\mathbf{U}, (\mathbf{x}_t, y_t))^q \right)^{\frac{1}{q}}.
 \end{aligned}$$

Putting all together we have

$$\|\mathbf{U}\|_F X \sqrt{2} \sqrt{\sum_{t=1}^T b_t} \geq \sum_{t=1}^T b_t - \left( \sum_{t=1}^T b_t \right)^{\frac{1}{p}} L_{\text{MH},q}(\mathbf{U})^{\frac{1}{q}}.$$

Noting that  $\sum_{t=1}^T b_t$  is equal to number of mistake  $M_T$ , we get the stated bound.  $\square$

**Lemma 5.** Suppose we are given positive real numbers  $L, T, H, U$  and function  $F(\gamma) = \min(T, L + \gamma T + \frac{UH}{\gamma} + \sqrt{\frac{UHL}{\gamma}})$ , where  $\gamma \in [0, 1]$ . Then:

1. If  $L \leq (U+1)\sqrt{HT}$ , then taking  $\gamma^* = \min(\sqrt{\frac{H}{T}}, 1)$  gives that  $F(\gamma^*) \leq L + 3(U+1)\sqrt{HT}$ .
2. If  $L > (U+1)\sqrt{HT}$ , then taking  $\gamma^* = \min((\frac{HL}{T^2})^{\frac{1}{3}}, 1)$  gives that  $F(\gamma^*) \leq L + 2(\sqrt{U} + 1)(HLT)^{\frac{1}{3}}$ .

*Proof.* We prove the two cases separately.

1. If  $T \leq H$ , then  $\gamma^* = 1$ ,  $F(\gamma^*) \leq T \leq L + 3(U+1)\sqrt{HT}$ .

Otherwise,  $T > H$ . In this case,  $\gamma^* = \sqrt{\frac{H}{T}}$ . We have that

$$\begin{aligned}
 &F(\gamma^*) \\
 &= L + \gamma^* T + \frac{UH}{\gamma^*} + \sqrt{\frac{UHL}{\gamma^*}} \\
 &= L + \sqrt{HT} + U\sqrt{HT} + \sqrt{UL\sqrt{HT}} \\
 &\leq L + (U+1)\sqrt{HT} + L + U\sqrt{HT} \\
 &\leq L + 3(U+1)\sqrt{HT}.
 \end{aligned}$$

where the first inequality is from that arithmetic mean-geometric mean inequality, the second inequality is by the assumption on  $L$ .

2. If  $HL > T^2$ , then  $\gamma^* = 1$ ,  $F(\gamma^*) \leq T \leq (HLT)^{\frac{1}{3}}$ .

Otherwise,  $HL \leq T^2$ . In this case,  $\gamma^* = (\frac{HL}{T^2})^{\frac{1}{3}}$ . We have that

$$\begin{aligned} F(\gamma^*) &= L + \gamma^* T + \frac{UH}{\gamma^*} + \sqrt{\frac{UHL^*}{\gamma}} \\ &= L + (HLT)^{\frac{1}{3}} + UH^{\frac{2}{3}}T^{\frac{2}{3}}L^{-\frac{1}{3}} + \sqrt{U}(HLT)^{\frac{1}{3}} \\ &\leq L + (\sqrt{U} + U^{\frac{1}{3}} + 1)(HLT)^{\frac{1}{3}} \\ &\leq L + 2(\sqrt{U} + 1)(HLT)^{\frac{1}{3}}. \end{aligned}$$

where the first inequality is from algebra and the condition on  $L$ , implying  $UH^{\frac{2}{3}}T^{\frac{2}{3}}L^{-\frac{1}{3}} \leq (HLT)^{\frac{1}{3}}U(\frac{HT}{L^2})^{\frac{1}{3}} \leq U^{\frac{1}{3}}(HLT)^{\frac{1}{3}}$ , the second inequality is from that  $U^{\frac{1}{3}} \leq \sqrt{U} + 1$ .

□

### C. Per-Step Analysis of Online Least Squares

For completeness, we present a technical lemma in online least squares, which has appeared in (e.g., Orabona et al., 2012).

**Lemma 6.** *Suppose  $z_t$ 's are vectors, and  $\alpha_t$ 's are scalars. For all  $t \geq 1$ , define  $\mathbf{A}_t = \sum_{s=1}^t z_s z_s^T$ ,  $w_t = -\mathbf{A}_{t-1}^{-1} \sum_{s=1}^{t-1} \alpha_s z_s$ . Then for any vector  $u$ , we have:*

$$\frac{1}{2}(\langle w_t, z_t \rangle + \alpha_t)^2 (1 - z_t^T \mathbf{A}_t^{-1} z_t) - \frac{1}{2}(\langle u, z_t \rangle + \alpha_t)^2 \leq \frac{1}{2} \|u - w_t\|_{\mathbf{A}_{t-1}}^2 - \frac{1}{2} \|u - w_{t+1}\|_{\mathbf{A}_t}^2.$$

*Proof.* Observe that  $w_t$ 's have the following recurrence:

$$w_{t+1} = \mathbf{A}_t^{-1} (\mathbf{A}_{t-1} w_t - \alpha_t z_t)$$

Since  $\mathbf{A}_t = \mathbf{A}_{t-1} + z_t z_t^T$ , we have

$$\mathbf{A}_t w_{t+1} = \mathbf{A}_t w_t - (w_t^T z_t + \alpha_t) z_t$$

Now, by standard online mirror descent analysis (See e.g. Cesa-Bianchi & Lugosi, 2006, proof of Theorem 11.1), we have

$$\begin{aligned} \langle w_t - u, (w_t^T z_t + \alpha_t) z_t \rangle &\leq \frac{1}{2} \|u - w_t\|_{\mathbf{A}_t}^2 - \frac{1}{2} \|u - w_{t+1}\|_{\mathbf{A}_t}^2 + \frac{1}{2} (w_t^T z_t + \alpha_t)^2 z_t^T \mathbf{A}_t^{-1} z_t \\ &\leq \frac{1}{2} \|u - w_t\|_{\mathbf{A}_{t-1}}^2 - \frac{1}{2} \|u - w_{t+1}\|_{\mathbf{A}_t}^2 + \frac{1}{2} (w_t^T z_t + \alpha_t)^2 z_t^T \mathbf{A}_t^{-1} z_t + \frac{1}{2} (u^T z_t - w_t^T z_t)^2 \end{aligned}$$

Now, move the last term on the RHS to the LHS, we get

$$(w_t^T z_t - u^T z_t) \cdot \frac{1}{2} (w_t^T z_t + u^T z_t + 2\alpha_t) \leq \frac{1}{2} \|u - w_t\|_{\mathbf{A}_{t-1}}^2 - \frac{1}{2} \|u - w_{t+1}\|_{\mathbf{A}_t}^2 + \frac{1}{2} (w_t^T z_t + \alpha_t)^2 z_t^T \mathbf{A}_t^{-1} z_t$$

i.e.

$$\frac{1}{2} (\langle w_t, z_t \rangle + \alpha_t)^2 - \frac{1}{2} (\langle u, z_t \rangle + \alpha_t)^2 \leq \frac{1}{2} \|u - w_t\|_{\mathbf{A}_{t-1}}^2 - \frac{1}{2} \|u - w_{t+1}\|_{\mathbf{A}_t}^2 + \frac{1}{2} (w_t^T z_t + \alpha_t)^2 z_t^T \mathbf{A}_t^{-1} z_t.$$

Now moving the last term on the RHS to the LHS, the lemma follows.

□
